# Supplementary material
Source: PubMed Central journal article supplement (PMC3295404)
Supplement: supp_err446_00070847-file001.pdf [file supp_err446_00070847-file001.pdf]

## **SUPPLEMENTARY MATERIAL**

### **Functional analysis of the Arabidopsis PLDZ2 promoter reveals an evolutionarily conserved low-Pi- responsive transcriptional enhancer element**

Araceli Oropeza-Aburto, Alfredo Cruz-Ramírez, Gustavo J. Acevedo-Hernández, Claudia-Anahí Pérez-Torres, Juan Caballero-Pérez and Luis Herrera Estrella

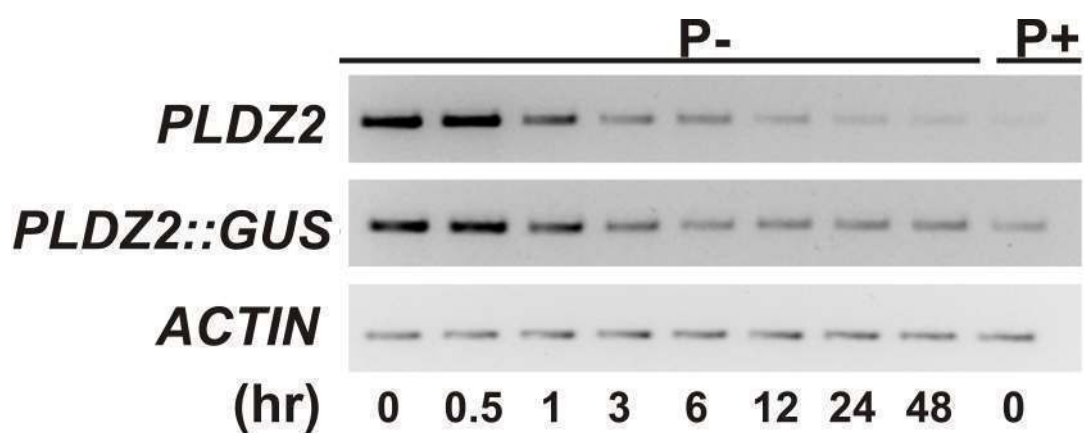

**Supplemental Figure S1. Comparison of the expression in response to Pi availability of *PLDZ2* and *PLDZ2::GUS*.** Semiquantitative RT-PCR analysis of *PLDZ2* and *PLDZ2::GUS* gene expression in wild type and transgenic *Arabidopsis*. Plants were grown in P- limiting medium for 7 days, and transferred to P+ liquid medium for 30 min, 60 min, 3 h, 6h, 12h, 24h and 48h. Controls of *PLDZ2* and *PLDZ2::GUS* expression for seedlings grown continuously under P+ conditions are shown.

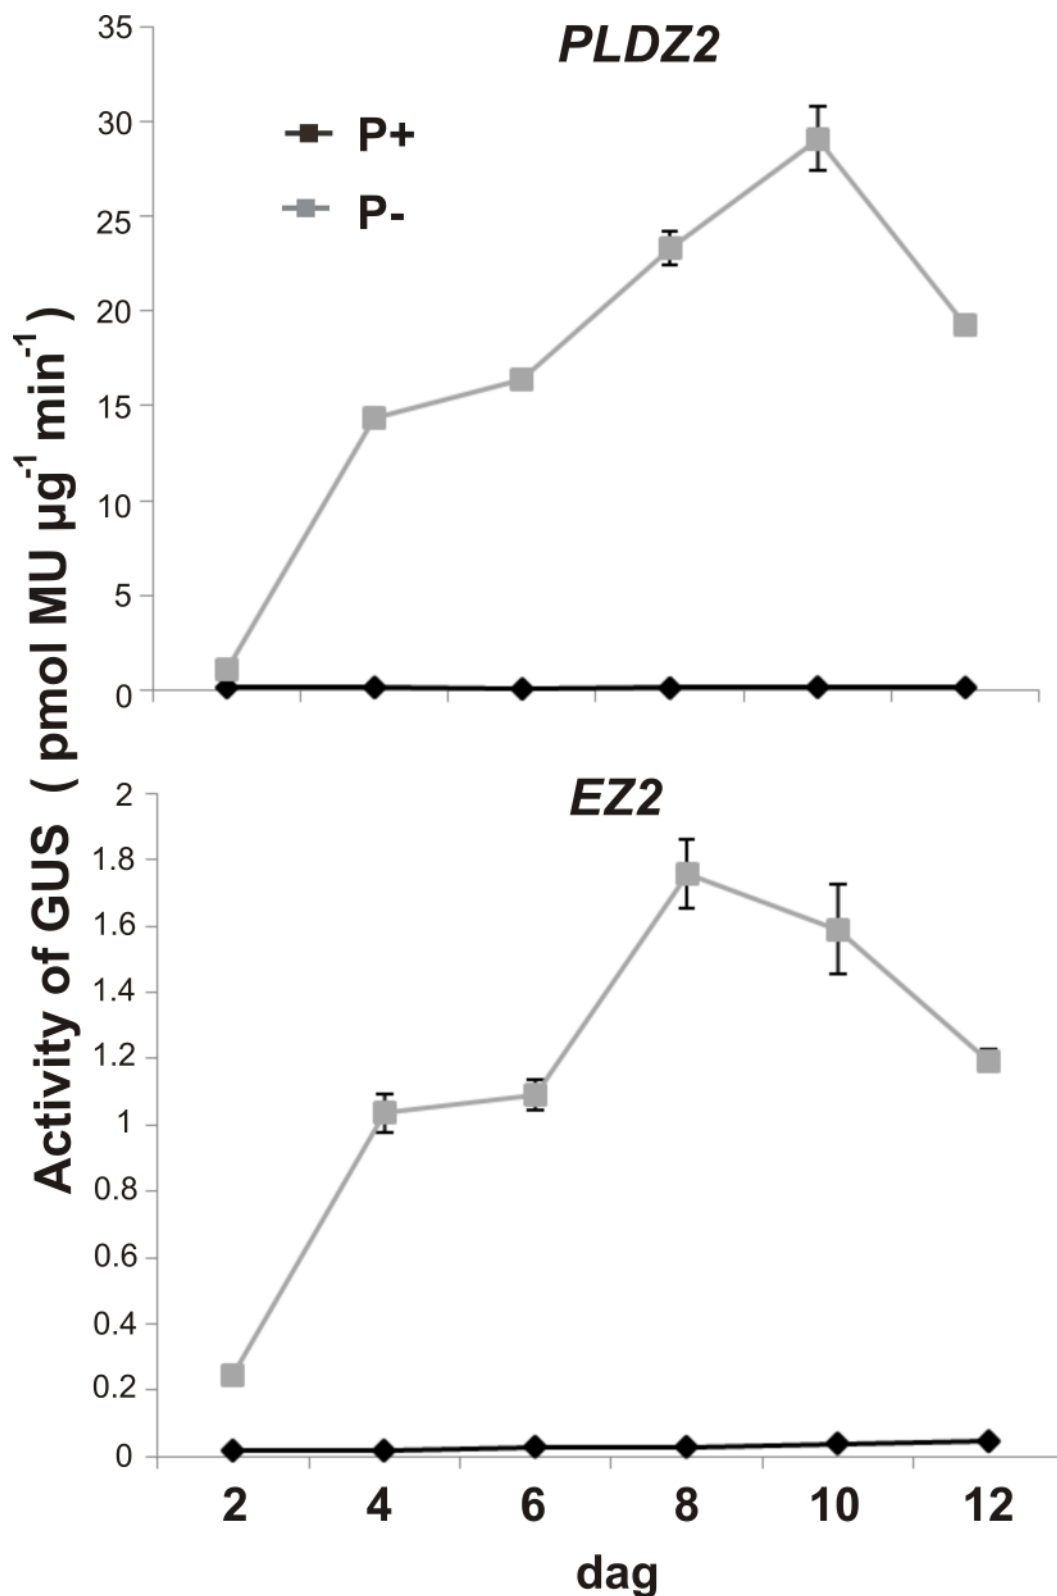

**Supplemental Figure 2. Temporal expression profiles of the *PLDZ2::GUS* and *EZ2::GUS*.** Seedling of *Arabidopsis* carrying the *PLDZ2::GUS* and *EZ2::GUS* were grown in MS P+ or P- and harvested after 2, 4, 6, 8, 10 and 12 days for fluorometric GUS assay.

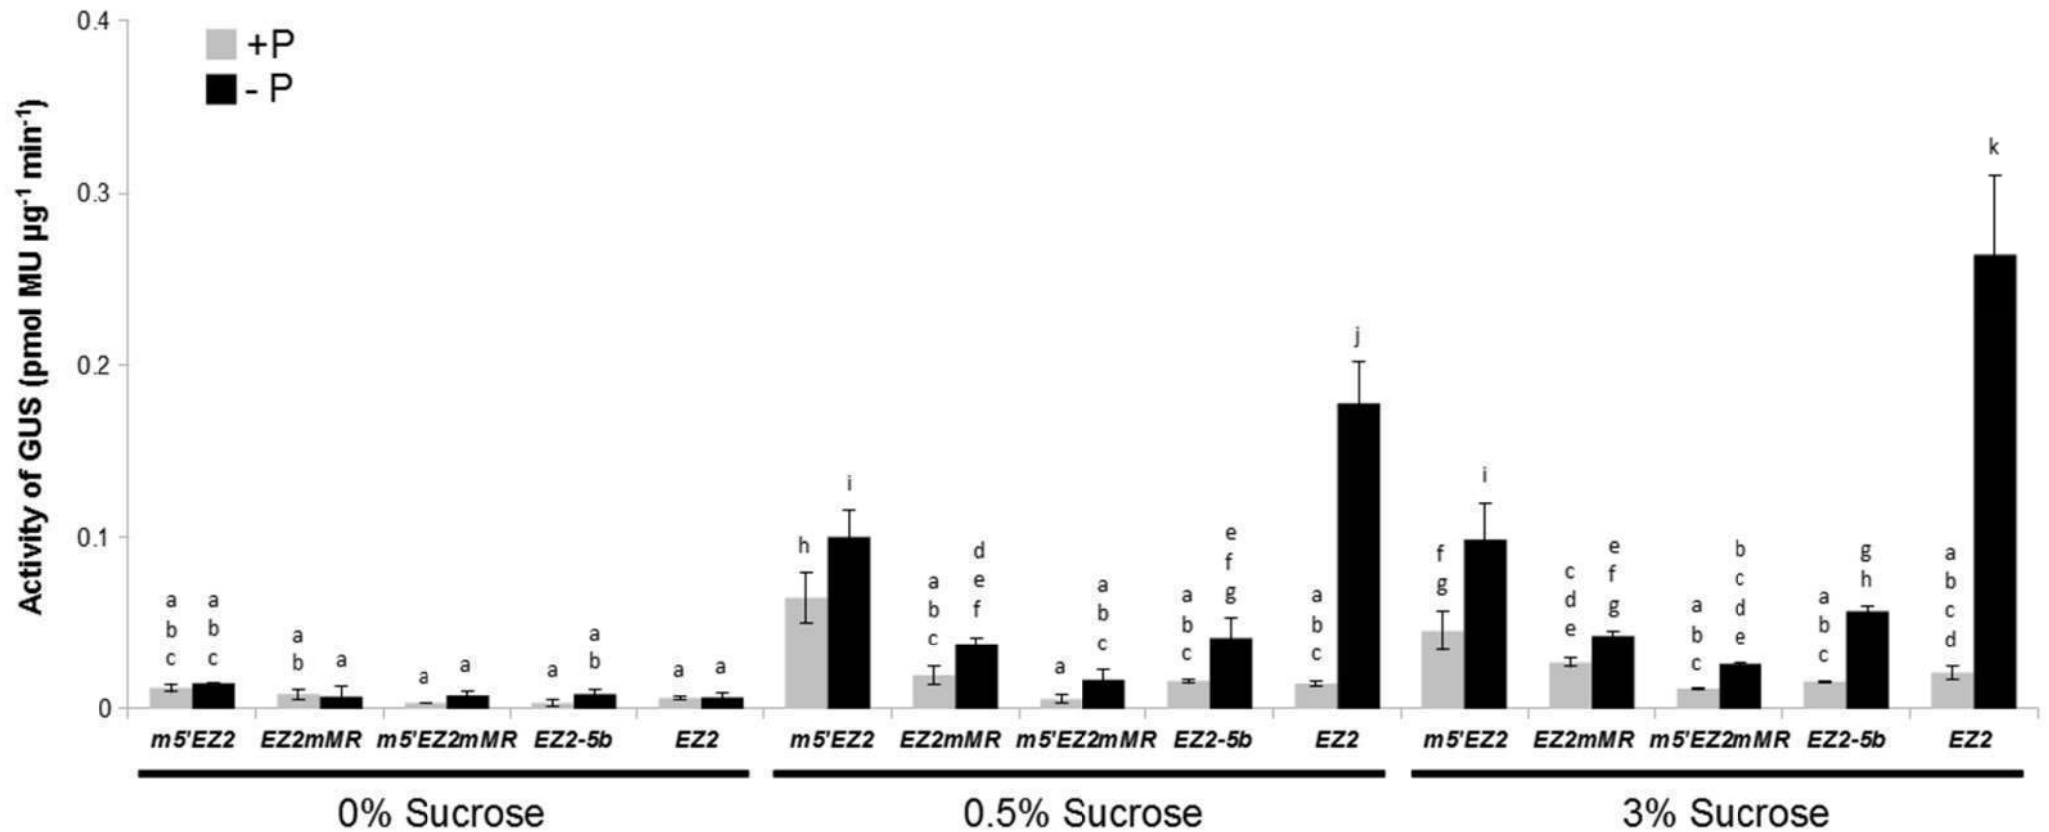

**Supplemental Figure S3. Effect of sucrose on the low-Pi responsiveness of mutant versions of *EZ2*.**

Fluorometric determination of GUS activity in transgenic seedlings harboring the *GUS* reporter gene under the control of the *EZ2* enhancer element and its mutant derivatives where deletions and substitutions were introduced. The region upstream of P1BS4 (*m5'EZ2*), the spacer sequence between P1BS4 and P1BS3 (*EZ2mMR*) or both the upstream and spacer sequences (*m5'EZ2mMR*) were replaced by random DNA sequences and the distance between the P1BS sites was reduced by 5 bp (*EZ2-5b*). Six days-old seedlings grown in P+ solid medium were transferred into P- liquid medium supplemented with different concentrations of sucrose (0%, 0.5% and 3%). Seedlings were harvested after 72 h of treatment for fluorometric GUS assay. Error bars represent SD of eight replicates. Different letters on the bars indicate significant differences at 95% confidence level, employing statistical ANOVA and Tukey analyses.

## ***A. rhizogenes* K599**

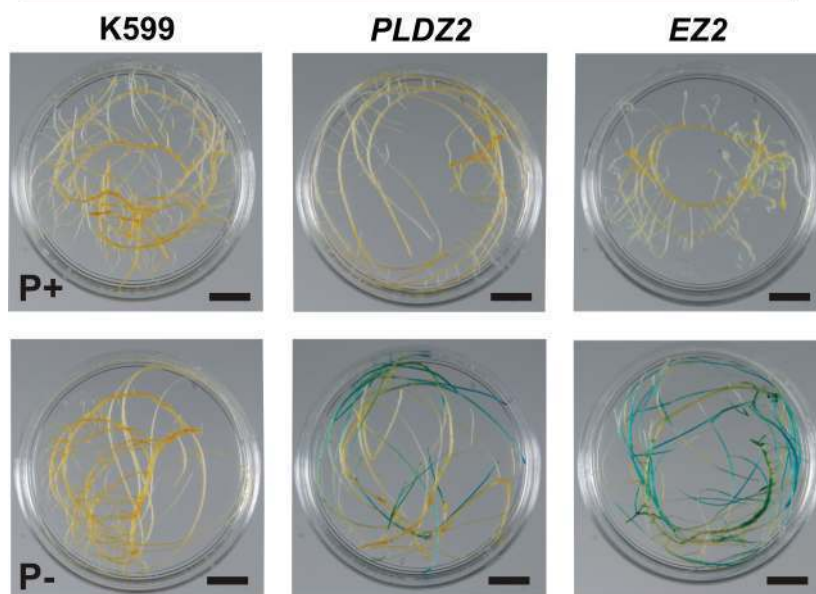

**Supplemental Figure S4. Expression of *EZ2::GUS* in transgenic bean roots.** Bean hairy roots transformed with *Agrobacterium rhizogenes* containing the *PLDZ2::GUS* or *EZ2::GUS* constructs. Hairy roots grown in solid P+ media were transferred to P+ or P- liquid media for 6 days and then subjected to GUS histochemical staining assays.

**Supplemental Table S1. Sequence of oligonucleotides used to produce deletion versions of the *PLD22* promoter, *EZ2* enhancer and primers used for Real Time and RT-PCR analysis**

**Sequence of oligonucleotides used to produce deletion versions of the *PLD22* promoter**

| Name         | SEQUENCE                                                  |
|--------------|-----------------------------------------------------------|
| PLD22 FWD    | 5' GGGGACAAGTTTGTACAAAAAAGCAGGCTAAGGAGTACCATTACAAAAAC 3'  |
| PLD22 Δ1 FWD | 5' GGGGACAAGTTTGTACAAAAAAGCAGGCTAAGTATTTCGCAATTGCTTTAG 3' |
| PLD22 Δ2 FWD | 5' GGGGACAAGTTTGTACAAAAAAGCAGGCTAAGATGGAAGGTAGTATATATG 3' |
| PLD22 Δ3 FWD | 5' GGGGACAAGTTTGTACAAAAAAGCAGGCTAAGACAGATTAGTTTAGTAAC 3'  |
| PLD22 Δ4 FWD | 5' GGGGACAAGTTTGTACAAAAAAGCAGGCTAAGTTATGGTTTACTTAAGG 3'   |
| PLD22 Δ5 FWD | 5' GGGGACAAGTTTGTACAAAAAAGCAGGCTAAGAATTAATAAGTGTGTTG 3'   |
| PLD22 Δ6 FWD | 5' GGGGACAAGTTTGTACAAAAAAGCAGGCTAAGTATCTGGCAAAGCACC 3'    |
| PLD22 Δ7 FWD | 5' GGGGACAAGTTTGTACAAAAAAGCAGGCTAAGTCGTCTGATGCTTGCAT 3'   |
| PLD22 Δ8 FWD | 5' GGGGACAAGTTTGTACAAAAAAGCAGGCTAACAGAGCTCTTGCCAATTTG 3'  |
| PLD22 Δ9 FWD | 5' GGGGACAAGTTTGTACAAAAAAGCAGGCTAACAGGTAGACGGGAG 3'       |
| PLD22 REV    | 5' GGGGACCACCTTGTACAAGAAAGCTGGTACCGTCGACATCGATTAAC 3'     |

**Sequence of oligonucleotides used to produce *EZ2* enhancer versions**

| Name                                                                                                        | SEQUENCE                                                                                 |
|-------------------------------------------------------------------------------------------------------------|------------------------------------------------------------------------------------------|
| EZ2                                                                                                         | 5' CGGGGTACCGAATTAATAAGTGTGTTGGGAATATTCTGATCTGGCAAAGCACCAAAAAATTGGGATATTCTTAAGCTTCGC 3'  |
| EZ2 REV                                                                                                     | 5' GCGAAGCTTA 3'                                                                         |
| EZ2P1B54(2X)                                                                                                | 5' CGGGGTACCGAATTAATAAGTGTGTTGGGAATATTCTGATCTGGCAAAGCACCAAAAAATTGGGATATTCTTAAGCTTCGC 3'  |
| EZ2P1B53(2X)                                                                                                | 5' CGGGGTACCGAATTAATAAGTGTGTTGGGGAATATTCTGATCTGGCAAAGCACCAAAAAATTGGGATATTCTTAAGCTTCGC 3' |
| EZ2mP1B54                                                                                                   | 5' CGGGGTACCGAATTAATAAGTGTGTTGGAGCGCGCTGATCTGGCAAAGCACCAAAAAATTGGGATATTCTTAAGCTTCGC 3'   |
| EZ2mP1B53                                                                                                   | 5' CGGGGTACCGAATTAATAAGTGTGTTGGGAATATTCTGATCTGGCAAAGCACCAAAAAATTGGGATATTCTTAAGCTTCGC 3'  |
| EZ2mP1B54-3                                                                                                 | 5' CGGGGTACCGAATTAATAAGTGTGTTGGAGCGCGCTGATCTGGCAAAGCACCAAAAAATTGGGATATTCTTAAGCTTCGC 3'   |
| m5'EZ2                                                                                                      | 5' CGGGGTACCGAATTAATAAGTGTGTTGGGAATATTCTGATCTGGCAAAGCACCAAAAAATTGGGATATTCTTAAGCTTCGC 3'  |
| EZ2mMR                                                                                                      | 5' CGGGGTACCGAATTAATAAGTGTGTTGGGAATATTCCAGCTCATTCTGATCTGGGGGCCAGGATATTCTTAAGCTTCGC 3'    |
| m5'EZ2mMR                                                                                                   | 5' CGGGGTACCGAATTAATAAGTGTGTTGGGAATATTCCAGCTCATTCTGATCTGGGGGCCAGGATATTCTTAAGCTTCGC 3'    |
| EZ2-5b                                                                                                      | 5' CGGGGTACCGAATTAATAAGTGTGTTGGGAATATTCTGCAAAGCACCAAAAAATTGGGATATTCTTAAGCTTCGC 3'        |
| EZ2, EZ2P1B54(2X), EZ2P1B53(2X), EZ2mP1B54, EZ2mP1B53, EZ2mP1B54-3, EZ2mMR, EZ2 -5b (RECOMBINATION FORWARD) | 5' GGGGACAAGTTTGTACAAAAAAGCAGGCTACGGTACCGAATTAATAAGTGTG 3'                               |
| m5'EZ2, m5'EZ2mMR (RECOMBINATION FORWARD)                                                                   | 5' GGGGACAAGTTTGTACAAAAAAGCAGGCTACGGTACCGTACCGATCCGCTCGCAG 3'                            |
| REV 46S (RECOMBINATION REVERSE)                                                                             | 5' GGGGACCACCTTGTACAAGAAAGCTGGTACCTGAATTCAGATCTCTAGA 3'                                  |

**REAL TIME and RT-PCR OLIGONUCLEOTIDES**

| Name         | SEQUENCE                          |
|--------------|-----------------------------------|
| PLD22-RT FWD | 5' CGAATGAACATATACGCTCAAGAGCTG 3' |
| PLD22-RT REV | 5' AGCAGTGAAGTAGAACTCGACTTGAGG 3' |
| ATPT2-RT FWD | 5' GCTTATTGTTGGGTGTAG 3'          |
| ATPT2-RT REV | 5' CTAACATTTGGGACCGTTC 3'         |
| IPS1-RT FWD  | 5' CTTCAATGTTTGGGTTGTACC 3'       |
| IPS1-RT REV  | 5' GCACTGGTCTGACTATTCTC 3'        |
| ACTINA FWD   | 5' GAATTGCTCTGTTGCTCCTCAC 3'      |
| ACTINA REV   | 5' TGCAATCCAGCCTCCACCATAC 3'      |
| UBQ4 FWD     | 5' GACGGACGCACACTTGCTGACTAC 3'    |
| UBQ4 REV     | 5' TCCTGGATCTTGCCTTGACATTG 3'     |
| GUS FWD      | 5' TGCTGTGCGCTTTAACCTCT 3'        |
| GUS REV      | 5' GGCACAGCACATCAAGAGA 3'         |

Supplemental Table S2. GUS activity of *PLDZ2* promoter and deletion derivatives.

| GUS activity ( $\mu\text{moles MU } \mu\text{g protein}^{-1} \text{ min}^{-1}$ ) |                   |                   |
|----------------------------------------------------------------------------------|-------------------|-------------------|
| Construct                                                                        | P+                | P-                |
| <i>PLDZ2::GUS</i>                                                                | 0.04 $\pm$ 0.003  | 42.5 $\pm$ 2.76   |
|                                                                                  | 0.07 $\pm$ 0.005  | 39.72 $\pm$ 2.31  |
|                                                                                  | 0.09 $\pm$ 0.003  | 110.94 $\pm$ 9.72 |
| <i>PLDZ2 <math>\Delta</math>1::GUS</i>                                           | 0.03 $\pm$ 0.003  | 50.10 $\pm$ 0.62  |
|                                                                                  | 0.05 $\pm$ 0.001  | 29.68 $\pm$ 0.55  |
|                                                                                  | 0.14 $\pm$ 0.008  | 21.10 $\pm$ 0.75  |
| <i>PLDZ2 <math>\Delta</math>2::GUS</i>                                           | 0.007 $\pm$ 0.004 | 32.19 $\pm$ 2.52  |
|                                                                                  | 0.09 $\pm$ 0.006  | 12.83 $\pm$ 0.97  |
|                                                                                  | 0.02 $\pm$ 0.002  | 59.51 $\pm$ 4.23  |
| <i>PLDZ2 <math>\Delta</math>3::GUS</i>                                           | 0.02 $\pm$ 0.001  | 29.18 $\pm$ 1.38  |
|                                                                                  | 0.01 $\pm$ 0.002  | 94.12 $\pm$ 2.78  |
|                                                                                  | 0.02 $\pm$ 0.002  | 63.40 $\pm$ 4.25  |
| <i>PLDZ2 <math>\Delta</math>4::GUS</i>                                           | 0.04 $\pm$ 0.001  | 6.51 $\pm$ 0.11   |
|                                                                                  | 0.02 $\pm$ 0.0003 | 3.59 $\pm$ 0.04   |
|                                                                                  | 0.06 $\pm$ 0.003  | 4.96 $\pm$ 0.34   |
| <i>PLDZ2 <math>\Delta</math>5::GUS</i>                                           | 0.06 $\pm$ 0.005  | 11.14 $\pm$ 1.07  |
|                                                                                  | 0.02 $\pm$ 0.001  | 5.86 $\pm$ 0.59   |
|                                                                                  | 0.03 $\pm$ 0.001  | 4.87 $\pm$ 0.25   |
| <i>PLDZ2 <math>\Delta</math>6::GUS</i>                                           | 0.02 $\pm$ 0.001  | 1.1 $\pm$ 0.05    |
|                                                                                  | 0.02 $\pm$ 0.01   | 0.57 $\pm$ 0.03   |
|                                                                                  | 0.13 $\pm$ 0.006  | 3.72 $\pm$ 0.14   |
| <i>PLDZ2 <math>\Delta</math>7::GUS</i>                                           | 0.01 $\pm$ 0.003  | 0.04 $\pm$ 0.002  |
|                                                                                  | 0.04 $\pm$ 0.003  | 0.07 $\pm$ 0.004  |
|                                                                                  | 0.02 $\pm$ 0.002  | 0.05 $\pm$ 0.004  |
| <i>PLDZ2 <math>\Delta</math>8::GUS</i>                                           | 0.02 $\pm$ 0.004  | 0.11 $\pm$ 0.01   |
|                                                                                  | 0.01 $\pm$ 0.001  | 0.04 $\pm$ 0.002  |
|                                                                                  | 0.01 $\pm$ 0.001  | 0.05 $\pm$ 0.002  |
| <i>PLDZ2 <math>\Delta</math>9::GUS</i>                                           | 0.01 $\pm$ 0.002  | 0.1 $\pm$ 0.007   |
|                                                                                  | 0.01 $\pm$ 0.002  | 0.09 $\pm$ 0.006  |
|                                                                                  | 0.01 $\pm$ 0.005  | 0.03 $\pm$ 0.002  |

**Supplemental Table S3. GUS activity directed by the *PLDZ2* promoter, EZ2 enhancer element and derivative constructs**

| <b>GUS activity (pmoles MU <math>\mu\text{g protein}^{-1} \text{min}^{-1}</math>)</b> |                   |                   |
|---------------------------------------------------------------------------------------|-------------------|-------------------|
| <b>Construct</b>                                                                      | <b>P+</b>         | <b>P-</b>         |
| <i>PLDZ2::GUS</i>                                                                     | 0.006 $\pm$ 0.002 | 36.7 $\pm$ 6.43   |
|                                                                                       | 0.009 $\pm$ 0.001 | 36.05 $\pm$ 1.51  |
|                                                                                       | 0.1 $\pm$ 0.004   | 35.55 $\pm$ 2.19  |
| <i>EZ2::GUS</i>                                                                       | 0.09 $\pm$ 0.004  | 3.9 $\pm$ 0.05    |
|                                                                                       | 0.03 $\pm$ 0.002  | 3.45 $\pm$ 0.02   |
|                                                                                       | 0.05 $\pm$ 0.005  | 6.93 $\pm$ 0.36   |
| <i>EZ2P1BS4(2x)::GUS</i>                                                              | 0.01 $\pm$ 0.003  | 10.69 $\pm$ 0.06  |
|                                                                                       | 0.60 $\pm$ 0.02   | 24.76 $\pm$ 1.23  |
|                                                                                       | 0.07 $\pm$ 0.005  | 6.54 $\pm$ 0.15   |
| <i>EZ2P1BS3(2x)::GUS</i>                                                              | 0.21 $\pm$ 0.01   | 0.94 $\pm$ 0.04   |
|                                                                                       | 0.04 $\pm$ 0.003  | 0.83 $\pm$ 0.01   |
|                                                                                       | 0.03 $\pm$ 0.002  | 1.30 $\pm$ 0.08   |
| <i>EZ2mP1BS4::GUS</i>                                                                 | 0.009 $\pm$ 0.001 | 0.06 $\pm$ 0.002  |
|                                                                                       | 0.01 $\pm$ 0.0005 | 0.09 $\pm$ 0.007  |
|                                                                                       | 0.03 $\pm$ 0.003  | 0.008 $\pm$ 0.001 |
| <i>EZ2mP1BS3::GUS</i>                                                                 | 0.07 $\pm$ 0.003  | 0.15 $\pm$ 0.003  |
|                                                                                       | 0.01 $\pm$ 0.003  | 0.07 $\pm$ 0.001  |
|                                                                                       | 0.01 $\pm$ 0.001  | 0.06 $\pm$ 0.002  |
| <i>EZ2mP1BS4-3::GUS</i>                                                               | 0.08 $\pm$ 0.003  | 0.18 $\pm$ 0.002  |
|                                                                                       | 0.19 $\pm$ 0.007  | 0.24 $\pm$ 0.002  |
|                                                                                       | 0.03 $\pm$ 0.003  | 0.22 $\pm$ 0.003  |
| <i>m5'EZ2::GUS</i>                                                                    | 0.15 $\pm$ 0.02   | 1.1 $\pm$ 0.03    |
|                                                                                       | 0.01 $\pm$ 0.001  | 1.02 $\pm$ 0.05   |
|                                                                                       | 0.008 $\pm$ 0.004 | 0.99 $\pm$ 0.04   |
| <i>EZ2mMR::GUS</i>                                                                    | 0.1 $\pm$ 0.005   | 0.92 $\pm$ 0.01   |
|                                                                                       | 0.06 $\pm$ 0.006  | 0.50 $\pm$ 0.02   |
|                                                                                       | 0.06 $\pm$ 0.005  | 1.26 $\pm$ 0.06   |
| <i>m5'EZ2mMR::GUS</i>                                                                 | 0.02 $\pm$ 0.007  | 0.04 $\pm$ 0.005  |
|                                                                                       | 0.01 $\pm$ 0.005  | 0.05 $\pm$ 0.003  |
|                                                                                       | 0.02 $\pm$ 0.001  | 0.02 $\pm$ 0.002  |
| <i>EZ2-5b::GUS</i>                                                                    | 0.03 $\pm$ 0.001  | 1.9 $\pm$ 0.05    |
|                                                                                       | 0.04 $\pm$ 0.003  | 1.19 $\pm$ 0.04   |
|                                                                                       | 0.11 $\pm$ 0.008  | 0.83 $\pm$ 0.01   |
